# Supplementary material for: Macroscale preparation of CoS2 nanoparticles for ultra-high fast-charging performance in sodium-ion batteries
Source: Royal Society of Chemistry journal article supplement (doi:10.1039/d3dt03675h), 2024-01-01
Supplement: d3dt03675h1.pdf [file d3dt03675h1.pdf]

## Supporting Information

### Macroscale Preparation of CoS<sub>2</sub> Nanoparticles for Ultra-High Fast-Charging Performance in Sodium-Ion Batteries

*Yan-Fen Liu*‡, *Tian Zhang*‡, *Huan-Huan Zhang*, *Ting-Ting Huang*\*, *Kai Wang*, *Yue-Xian Song*, *Jun-Fei Liang*, *Yan-Gang Zhang*, *Wei Fan*, *Xiao-Bin Zhong*\*

School of Energy and Power Engineering, School of Mechanical and Electrical Engineering, North University of China, Taiyuan 030051, Shanxi, P. R. China

#### Experimental

##### Synthesis of materials

CoS<sub>2</sub> was prepared by the co-precipitation method by first adding 2 mol of CoSO<sub>4</sub> (SCR) to 500 mL of water (solution A) while 16 mol of C<sub>2</sub>H<sub>2</sub>O<sub>4</sub> (Innochem 99.5%) was dissolved in 500 mL of anhydrous ethanol (SCR) (solution B). Solution A was then injected into solution B at a titration rate of 200 mL·min<sup>-1</sup>. When the titration was completed, the pink slurry product obtained was immediately centrifuged and washed three times each with water and ethanol, and then the product was dried, with the temperature conditions set at 100 °C for 12 h. The CoC<sub>2</sub>O<sub>4</sub> was then dried in a tube furnace. After drying, the sample was calcined in a tube furnace to obtain the Co<sub>3</sub>O<sub>4</sub>, and its calcination conditions were set at 350 °C for 2 hours. Finally, the precursor cooled to room temperature was injected with single sulfur powder, the mass ratio of sulfur powder (Innochem 99.95%) to precursor was 4:1, and CoS<sub>2</sub> was obtained by

sulfuring the sample with a tube furnace at 500 °C for 2 h under nitrogen atmosphere. The formation process is shown schematically in Fig. S1. For comparison, the preparation method of commercial CoS<sub>2</sub> was prepared using a similar method.

### **Material characterization**

SEM (TESCAN MIRA LMS Scanning Electron Microscope) to observe the morphology of materials, TF20 Transmission Electron Microscope (TEM) to observe the fine morphology, X-ray diffraction pattern (XRD) (Japan SmartLab-SEX) with Cu K $\alpha$  radiation to analyse the content of the internal physical phases and the crystalline condition, X-ray photoelectron spectroscopy (XPS) test to analyse the chemical composition of the samples, and the molecular structure of the materials are analysed accurately and non-destructively using Raman Spectroscopic Instruments.

### **Electrochemical performance tests**

In the slurry composition, the mass ratio of the active substance was 70%, and the remaining superconducting carbon black (MJS) and binder (CMC, MJS) were 20% and 10%, respectively, then the coated copper foil was dried in vacuum ovens at 80 °C for 12 h. The slurry was then coated onto copper foil using a doctor blade and then dried under vacuum to form the working electrode (thickness of 10  $\mu$ m), and mass loading of active material was 1.2 mg·cm<sup>-2</sup>. And the composite electrodes were not compressed. Coin cells (CR2032) were assembled with a sodium foil counter and reference electrode, a polypropylene membrane (GLASS MICROFIBER FILTERS) separator. The electrolyte (MJS) was 1 mol/L NaPF<sub>6</sub> in a mixture of DEG/DME (v/v=1:1). the coated copper foil was cut into a 12 mm diameter electrode disks. Coin cell was

assembled in a glovebox with ultra-argon ( $\text{H}_2\text{O} < 0.01$  ppm,  $\text{O}_2 < 0.01$  ppm). The electrochemical reaction kinetics of the obtained electrode was studied by cyclic voltammetry (CV). The scanning rate was  $0.1 \text{ mV}\cdot\text{s}^{-1}$ , within the potential range of 0.01 to 2.8 V. In addition, the galvanostatic charge/discharge measurements were tested at room temperature between 0.01 and 2.8 V on LAND CT2010. AC impedance testing (EIS) determined on electrochemical workstation (IviumStat), electrochemical workstation in the frequency range from 0.1 Hz to 10 kHz and amplitude was 0.005 V. The Galvanostatic Intermittent Titration Technique (GITT) was used to analyze the diffusion of  $\text{Na}^+$  on the electrode.

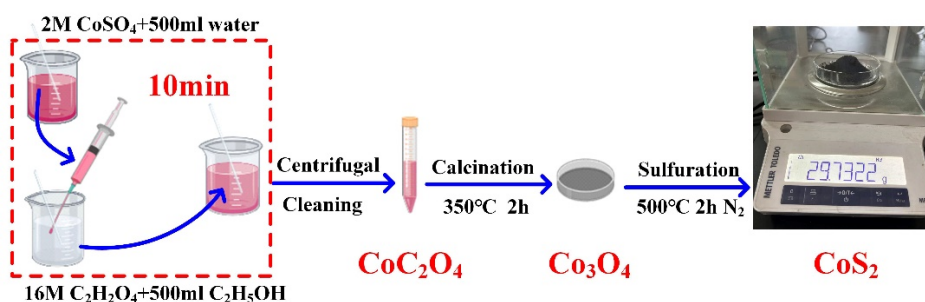

**Fig. S1** Schematic illustration of the formation of  $\text{CoS}_2$ .

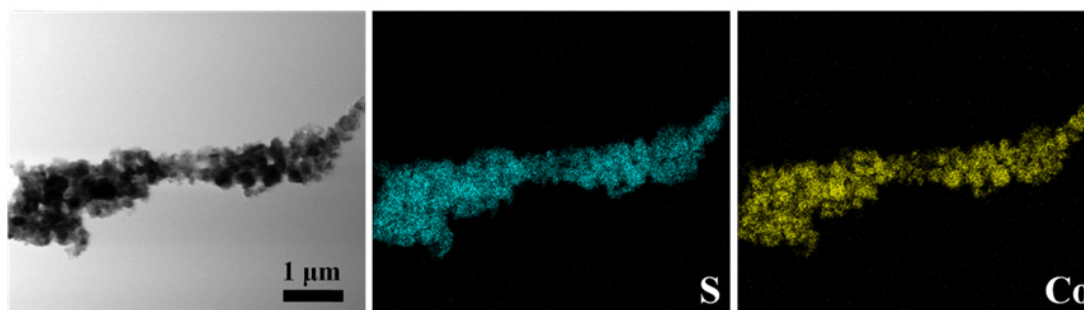

**Fig. S2** EDX element distribution maps of Co (yellow) and S (blue).

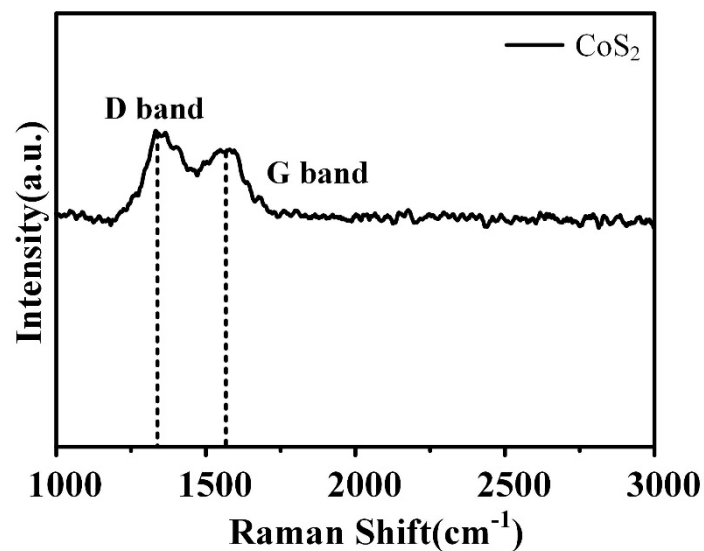

Fig. S3 Raman spectra of CoS<sub>2</sub>

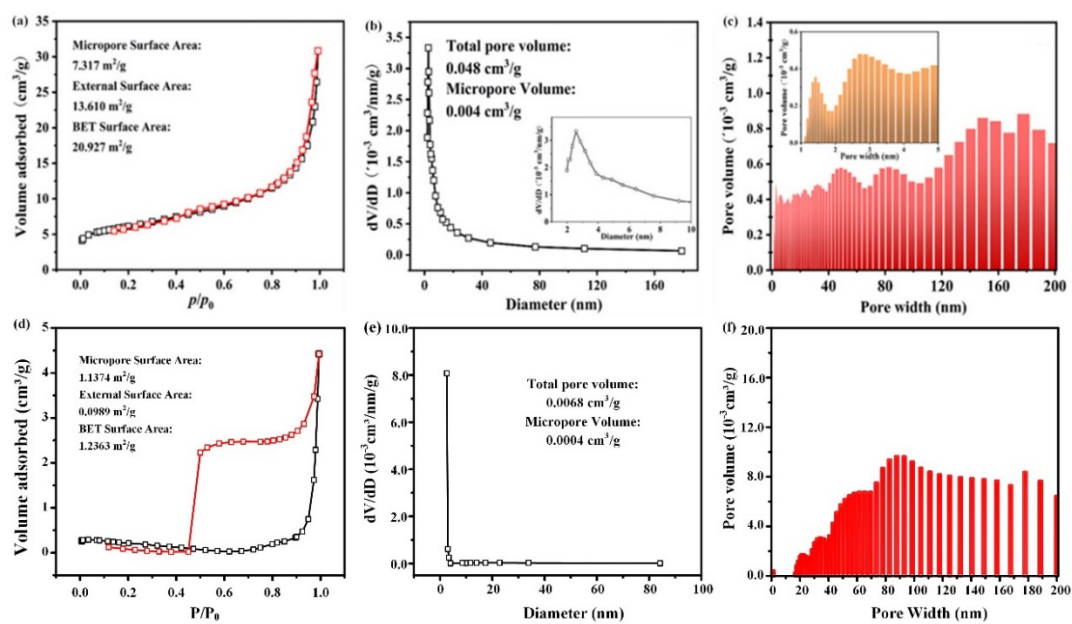

Fig. S4 (a) N<sub>2</sub> desorption/adsorption isotherm of CoS<sub>2</sub> and (b), (c) their pore size; (d) N<sub>2</sub> desorption/adsorption isotherm of commercial CoS<sub>2</sub> and (e), (f) their pore size.

**Table S1** Comparison of Sodium Storage Properties of anode materials.

| Electrode materials                                         | Preparation method<br>/yield | Current<br>density              | Cyclability( $\text{mAh}\cdot\text{g}^{-1}$ ) | Electrode<br>materials |
|-------------------------------------------------------------|------------------------------|---------------------------------|-----------------------------------------------|------------------------|
| CoS <sub>2</sub> nanoparticles                              | co-precipitation             | $0.1\text{A}\cdot\text{g}^{-1}$ | 970 (150th cycles)                            | <b>This<br/>work</b>   |
|                                                             |                              | $1\text{A}\cdot\text{g}^{-1}$   | 760 (400th cycles)                            |                        |
|                                                             |                              | $5\text{A}\cdot\text{g}^{-1}$   | 685.5 (400th cycles)                          |                        |
| N-C/CoS <sub>2</sub>                                        | one-pot solvothermal         | $1\text{A}\cdot\text{g}^{-1}$   | 704 (400th cycles)                            | [S1]                   |
| CoS <sub>2</sub> /C/C                                       | solvothermal                 | $0.1\text{A}\cdot\text{g}^{-1}$ | 712 (100th cycles)                            | [S2]                   |
| CoS <sub>2</sub> /C                                         | solution precipitation       | $0.1\text{A}\cdot\text{g}^{-1}$ | 510 (100th cycles)                            | [S3]                   |
| Co <sub>9</sub> S <sub>8</sub> -HB                          | solvothermal                 | $0.5\text{A}\cdot\text{g}^{-1}$ | 550 (100th cycles)                            | [S4]                   |
| CoS <sub>2</sub> @MCNFs                                     | solvothermal                 | $1\text{A}\cdot\text{g}^{-1}$   | 620 (900th cycles)                            | [S5]                   |
| NiS <sub>2</sub> @CoS <sub>2</sub> @C@C                     | co-precipitation             | $1\text{A}\cdot\text{g}^{-1}$   | 600 (250th cycles)                            | [S6]                   |
| CoO/Co <sub>3</sub> S <sub>4</sub> @N-C-<br>36              | one-pot solvothermal         | $0.1\text{A}\cdot\text{g}^{-1}$ | 577.3 (60th cycles)                           | [S7]                   |
| CoS <sub>2</sub> /rGO                                       | solvothermal                 | $1\text{A}\cdot\text{g}^{-1}$   | 192(1000th cycles)                            | [S8]                   |
| f-<br>Ti <sub>3</sub> C <sub>2</sub> /CoS <sub>2</sub> @NPC |                              | $2\text{A}\cdot\text{g}^{-1}$   | 200.6(1500th cycles)                          | [S9]                   |
| CoS <sub>2</sub> /NGC-1:30                                  |                              | $1\text{A}\cdot\text{g}^{-1}$   | 341(1000th cycles)                            | [S10]                  |

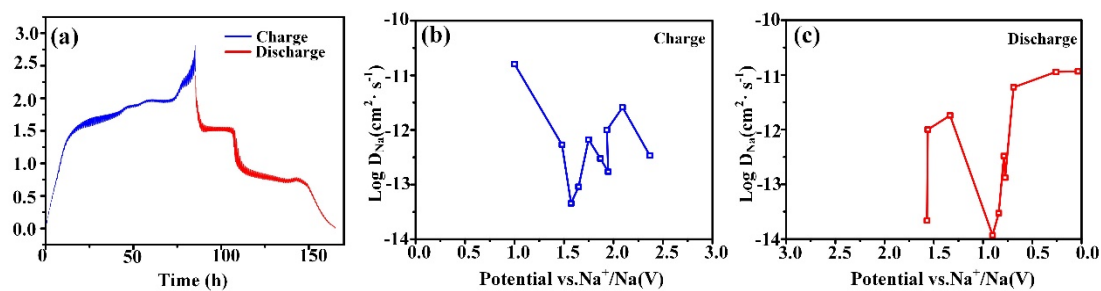**Fig. S5** GITT test curve of commercial CoS<sub>2</sub> (a), LogD<sub>Na</sub> values during charging (b) and discharging (c).

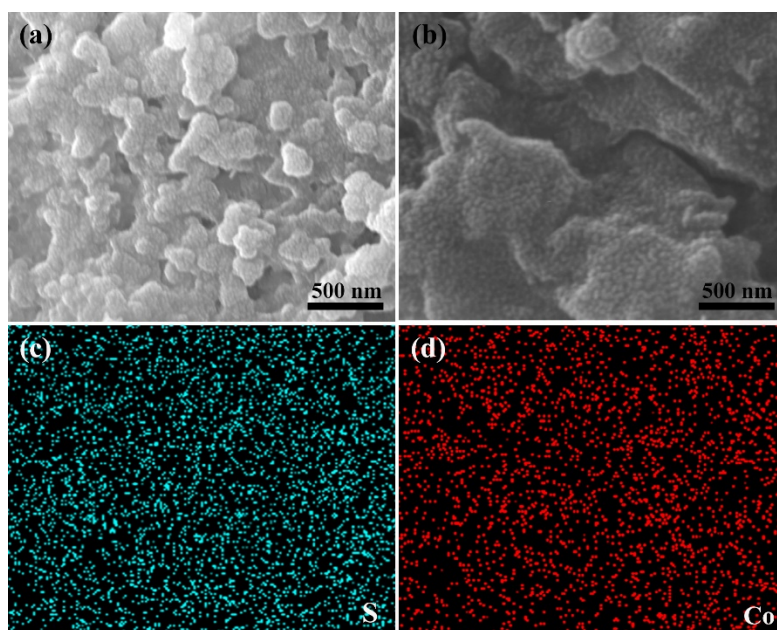

**Fig. S6** (a) SEM images of the  $\text{CoS}_2$  after 30 cycles at  $0.1 \text{ A} \cdot \text{g}^{-1}$ . (b, c, d) EDX element distribution maps of S (blue) and Co (red).

## References

- S1 Y. Pan, X. Cheng, L. Gong, L. Shi and H. Zhang, *Nanoscale*, 2018, **10**, 20813–20820.
- S2 F. Xiao, X. Yang, D. Wang, H. Wang, D. Y. W. Yu and A. L. Rogach, *ACS Appl. Mater. Inter.*, 2020, **12**, 12809–12820.
- S3 F. Han, T. Lv, B. Sun, W. Tang, C. Zhang and X. Li, *RSC Adv.*, 2017, **7**, 30699–30706.
- S4 M. Yin, D. Zhao, C. Feng, W. Zhou, Q. Jiao, X. Feng, S. Wang, Y. Zhao, H. Li and T. Feng, *ACS Sustain. Chem. Eng.*, 2020, **8**, 6305–6314.
- S5 Y. Pan, X. Cheng, L. Gong, L. Shi, T. Zhou, Y. Deng and H. Zhang, *ACS Appl. Mater. Inter.*, 2018, **10**, 31441–31451.
- S6 Y. Lin, Z. Qiu, D. Li, S. Ullah, Y. Hai, H. Xin, W. Liao, B. Yang, H. Fan, J. Xu and C. Zhu, *Energy Storage Mater.*, 2018, **11**, 67–74.
- S7 C. Guo, W. Zhang, Y. Liu, J. He, S. Yang, M. Liu, Q. Wang and Z. Cuo, *Adv. Funct. Mater.*, 2019, **29**, 1901925.

- S8 Z. Li, W. Feng, Y. Lin, X. Liu and H. Fei, *RSC Adv.*, 2016, **6**, 70632–70637.
- S9 P. Huang, H. Ying, S. Zhang, Z. Zhang and W.-Q. Han, *Chem. Eng. J.*, 2022, **429**, 132396.
- S10 Y. Zheng, L. He, X. Kong, Y. Song and Y. Zhao, *Appl. Surf. Sci.*, 2022, **603**, 154481.
